# Supplementary material for: Template-free synthesis of core–shell CeO2 nanospheres
Source: Royal Society of Chemistry journal article supplement (doi:10.1039/c3ra46292g), 2014-01-01
Supplement: c3ra46292g.pdf [file c3ra46292g.pdf]

Electronic Supplementary Material (ESI) for Chemical Communications

## Template-free synthesis of core-shell CeO<sub>2</sub> nanospheres

Anran Xie, Jinxin Guo, Wei Liu and Yanzhao Yang\*

Key Laboratory for Special Functional Aggregate Materials of Education Ministry, School of Chemistry and Chemical Engineering, Shandong University, Jinan, 250100, P. R. China. E-mail: yzhyang@sdu.edu.cn;

### Experimental section

#### Synthesis of core-shell CeO<sub>2</sub>

Cerous nitrate (Ce(NO<sub>3</sub>)<sub>2</sub>·6H<sub>2</sub>O, 99.0%), urea (CO(NH<sub>2</sub>)<sub>2</sub>, 99.0%), and citric acid (C<sub>6</sub>H<sub>8</sub>O<sub>7</sub>·H<sub>2</sub>O, 99.0%), hydrogen peroxide (H<sub>2</sub>O<sub>2</sub>, 30%) and n-butanol (C<sub>4</sub>H<sub>10</sub>O, 99.0%) were purchased from Sinopharm Chemical Reagent Co. Ltd. Deionized water was used throughout.

Preparation of CeO<sub>2</sub> core-shell nanostructures is synthesized through a typical hydrothermal process. Ce(NO<sub>3</sub>)<sub>2</sub>·6H<sub>2</sub>O (0.07 g), urea (0.01 g), C<sub>6</sub>H<sub>8</sub>O<sub>7</sub>·H<sub>2</sub>O (0.017 g) were dissolved in 16 mL of 7:1 water/n-butanol mixture. After continuous stirring for 20 min, 100 μL H<sub>2</sub>O<sub>2</sub> was added into the mixture. The transparent mixture was then put into a Teflon-lined stainless steel autoclave of 25 mL capacity. After being sealed, the autoclave was heated at 120 °C for 24 h in a drying oven. After cooling the reaction mixture to room temperature, the products were washed with deionized water and absolute ethanol at 3 times. Subsequently, the products were dried in a drying oven for 7 h at 60 °C without any further treatment.

#### Characterization

The phase identity, composition were recorded by using a Rigaku D/Max 2200PC diffractometer with a graphite monochromator and Cu-Kα radiation (λ = 0.15418 nm). The structure, size, and shape of the products were characterized by a transmission electron microscope (TEM, JEM100-CXII) with an accelerating voltage of 80 kV, a field-emission scanning electron microscope (FE-SEM, Hitachi, S4800), and a high-resolution transmission electron microscope (HRTEM, JEM-2100) with an accelerating voltage of 200 kV.

The surface areas were calculated by the Brunauer-Emmett-Teller (BET) method and the pore size distribution was calculated from the desorption branch using the Barrett-Joyner-Halenda (BJH) theory.

The catalytic properties of the products was evaluated through the CO oxidation experiment. In a typical experiment, 25 mg catalyst particles mixed with 300 mg silica sand were placed in the reactor. The reactant gases (1% CO, 10% O<sub>2</sub>, and 89% N<sub>2</sub>) passed through the reactor at a rate of 30 mL/min. The composition of the gas exiting the reactor was analyzed with an online infrared gas analyzer, which simultaneously detects CO and CO<sub>2</sub> with a resolution of 10 ppm. The results were further confirmed with a Shimadzu gas chromatograph (GC-14).

#### Reaction equation

The following reactions are involved in the formation of CeO<sub>2</sub> NPs.

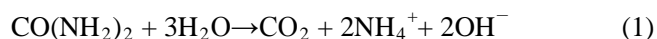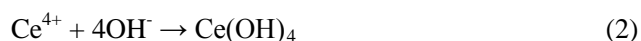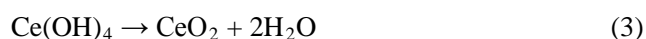

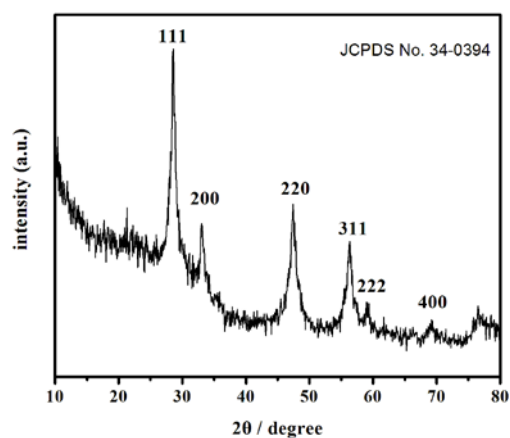

**Figure S1.** XRD pattern of the nanoparticles prepared by the CA-assisted hydrothermal process at 120 °C

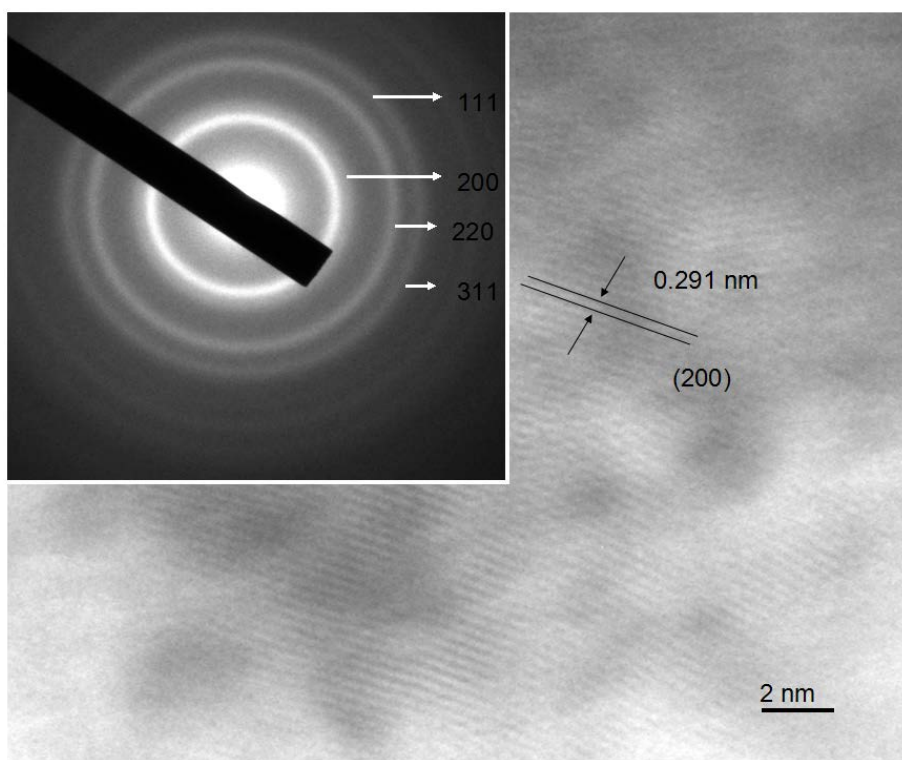

**Figure S2.** HRTEM images of the edge of nanosphere synthesized at 120 °C for 24 h.

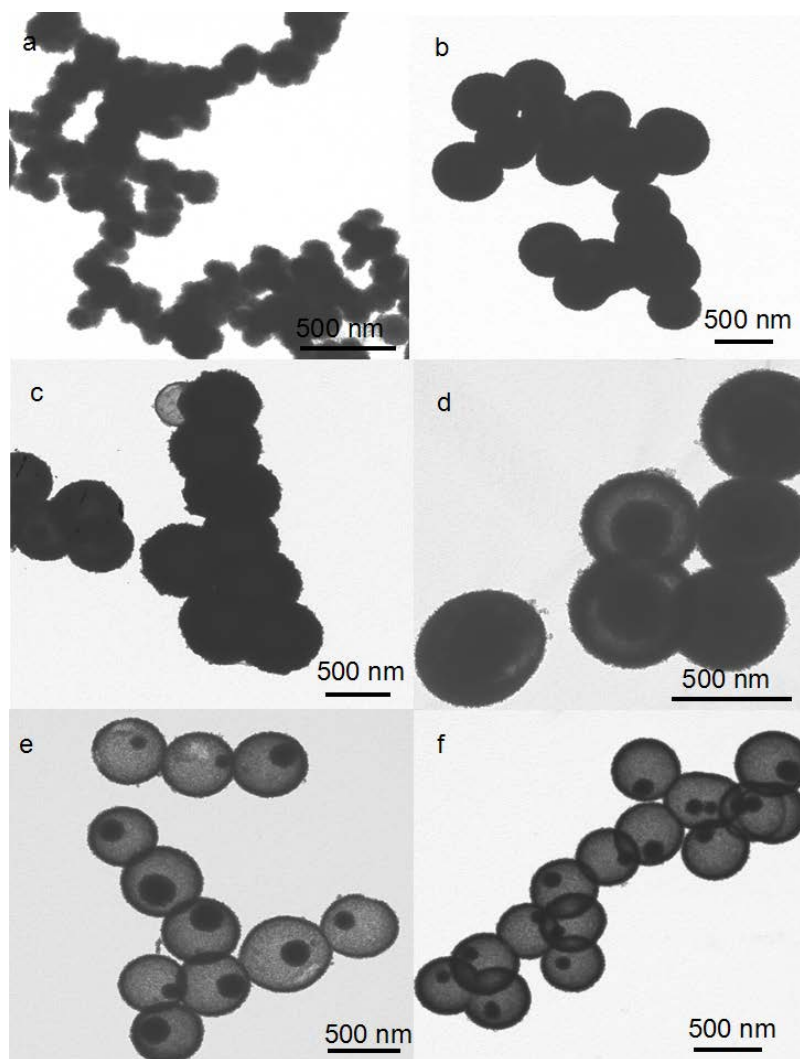

**Figure S3.** TEM investigation of formation process of CeO<sub>2</sub> core-shell structures: after a) 4 h , b) 8 h, c) 12 h, d) 16 h, e) 20 h and f) 24 h at 120 °C.

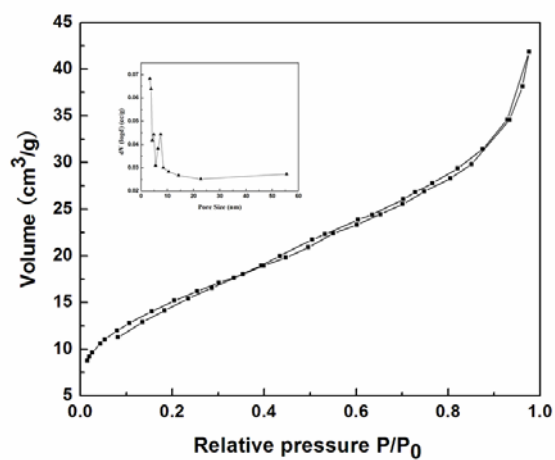

**Figure S4.** N<sub>2</sub> adsorption-desorption isotherm of the as-prepared core-shell CeO<sub>2</sub> inset is the corresponding BJH pore size distribution curve.
